# Supplementary material
Source: publisher figshare collection journal article supplement (https://acs.figshare.com/ndownloader/files/4154695)
Supplement: Supplementary file 1 [file 4154695]

# Uniform and Porous $\text{Ce}_{1-x}\text{Zn}_x\text{O}_{2-\delta}$ Solid Solution Nanodisks:

## Preparation and Their CO Oxidation Activity

Sheng-Liang Zhong<sup>a, b\*</sup>, Lin-Fei Zhang<sup>a</sup>, Lei Wang<sup>a</sup>, Wei-Xin Huang<sup>b</sup>, Cong-Min Fan<sup>b</sup> and An-Wu Xu<sup>b\*</sup>

### Supplementary Information

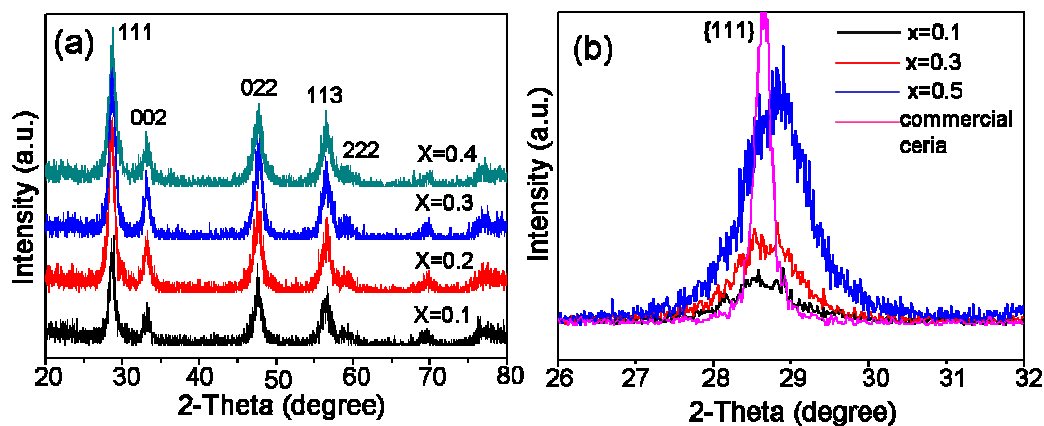

**Figure S1.** (a) The XRD patterns of  $\text{Ce-Zn}_x$  precursor calcined in air at 600 °C for 3 h, (b) fine scan of the (111) peaks.

By comparing with X-ray spectra from  $\text{Ce-Zn}_x$  nanodisks and commercial ceria (AR grade), peak shift towards wider angles and peak widening in  $\text{Ce-Zn}_x$  nanodisks was observed, indicating that the lattice parameter is decreased. According to the references,<sup>1-3</sup> we obtain the lattice parameter of these  $\text{Ce-Zn}_x$  based on the XRD results. Comparing with commercial ceria, the lattice parameter decreases from 0.5410 nm (commercial ceria) to 0.5394 nm for  $\text{Ce-Zn}_x$ . The lattice distortion of  $\text{Ce-Zn}_x$  was caused by the introduction of the oxygen vacancies via doping with  $\text{Zn}^{2+}$  and the accompanying  $\text{Ce}^{3+}$  ions.<sup>1-3</sup> The result is consistent with the XPS analysis.

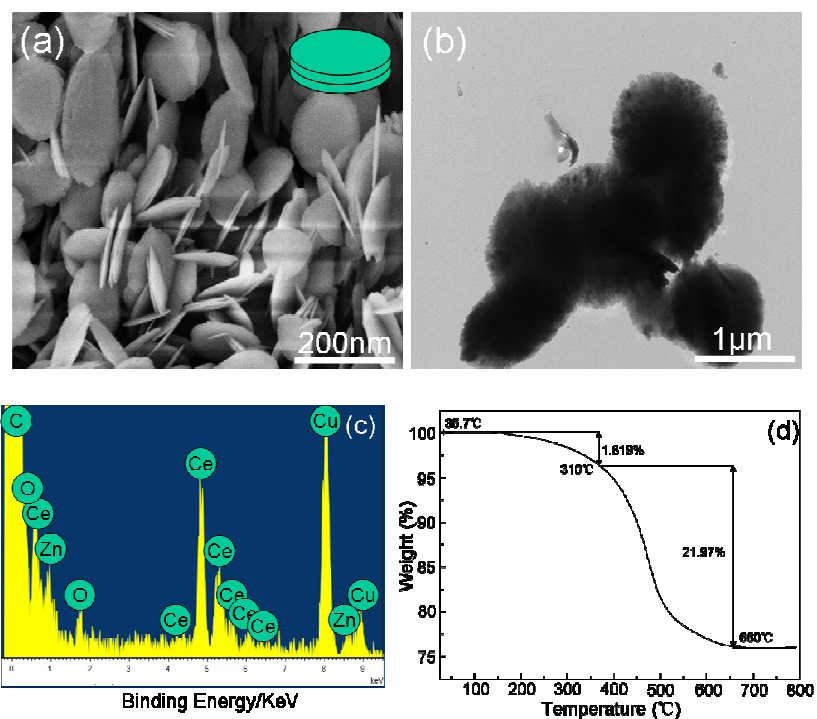

**Figure S2.** (a) SEM image and (b) TEM image, (c) EDS analysis, (d) TG analysis of the  $\text{Ce-Zn}_{0.3}$  precursor prepared at 160 °C for 24 h.

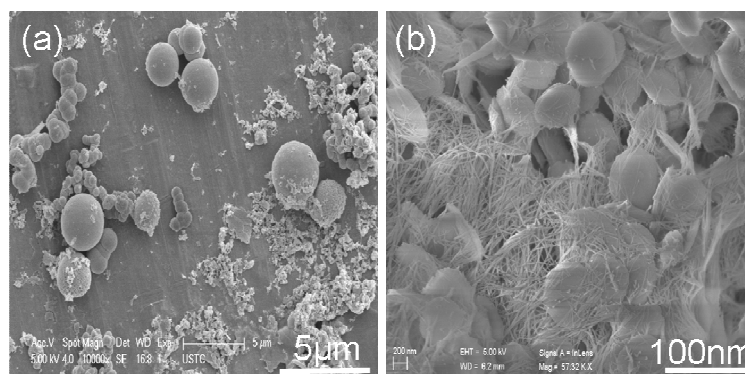

**Figure S3.** SEM images of the as-prepared  $\text{Ce-Zn}_{0.3}$  precursor at different temperature. (a) 120 °C, 8 h; (b) 160 °C, 8 h.

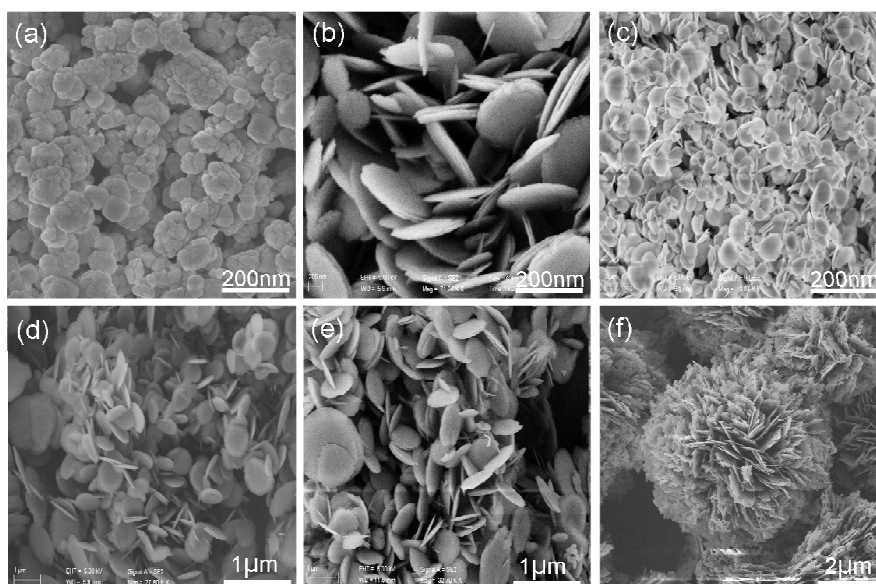

**Figure S4.** SEM images of the  $\text{Ce-Zn}_x$  precursors prepared at 160 °C for 24 h with different molar ratios of  $\text{Ce}^{3+}$  to  $\text{Zn}^{2+}$ . (a)  $x = 0$ ; (b)  $x = 0.1$ ; (c)  $x = 0.2$ ; (d)  $x = 0.3$ ; (e)  $x = 0.4$ ; (f)  $x = 1.0$ .

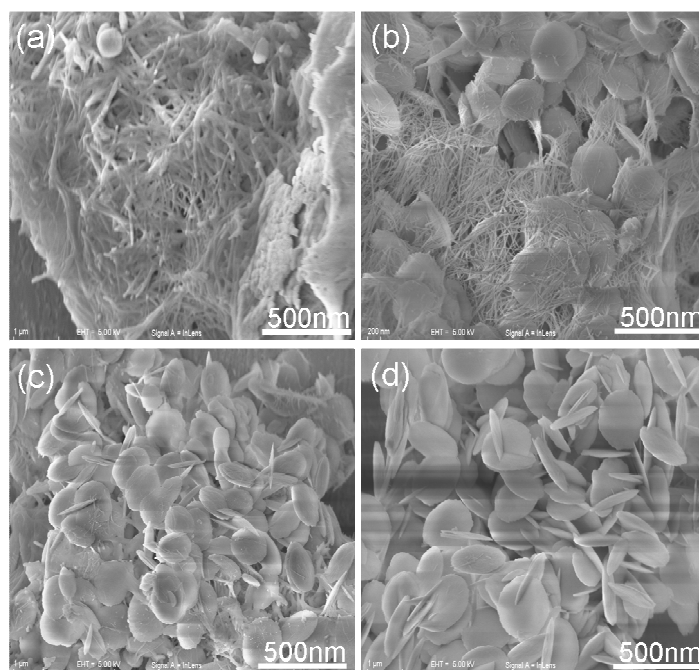

**Figure S5.** SEM images of the  $\text{Ce-Zn}_{0.3}$  precursor prepared at 160 °C for different reaction time. (a) 4 h, (b) 8 h, (c) 16 h, and (d) 24 h.

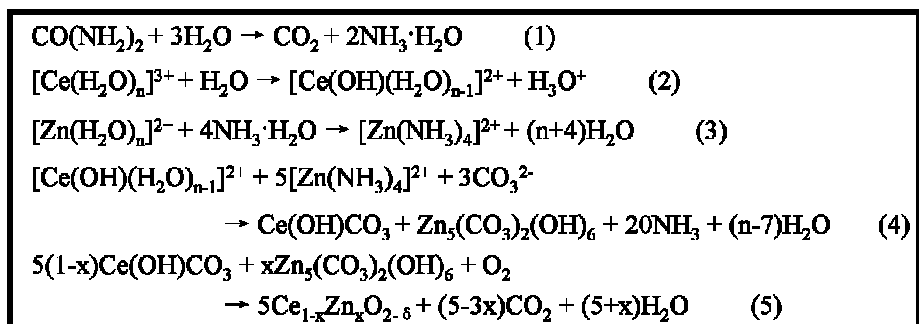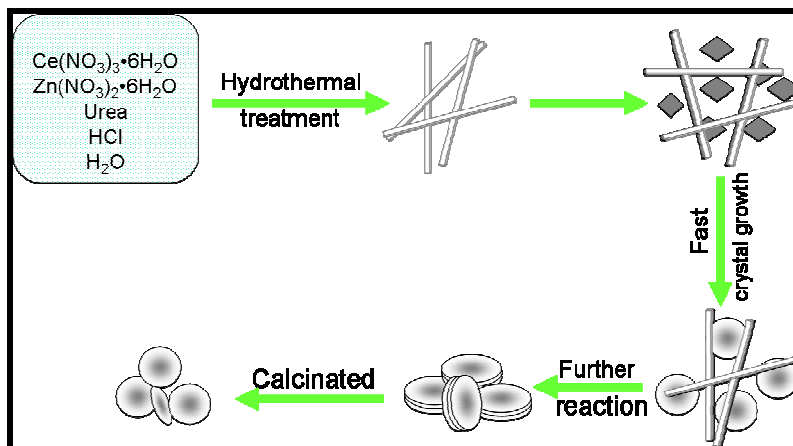

**Scheme S1.** Schematic illustration of the formation process of **Ce-Zn<sub>x</sub>** nanodisks may be summarized by the above reactions.

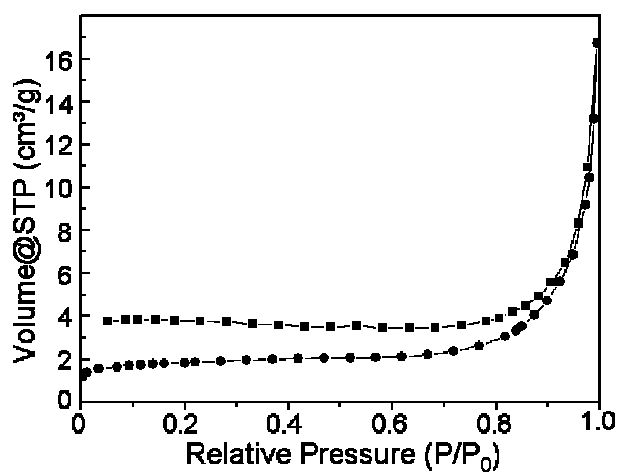

**Figure S6.** N<sub>2</sub> adsorption and desorption isotherms of the porous **Ce-Zn<sub>0.3</sub>** nanodisks.



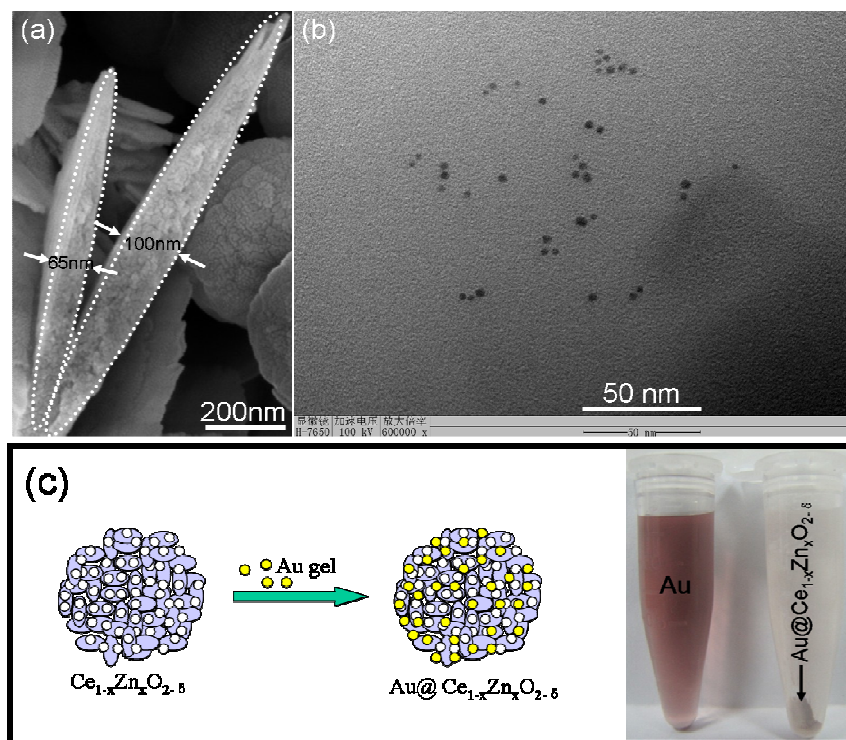

**Figure S7.** (a) SEM image of cross-section of Au@Ce<sub>1-x</sub>Zn<sub>x</sub>O<sub>2-δ</sub> (x = 0.3), (b) TEM image of Au nanoparticles, (c)

Ce-Zn<sub>0.3</sub> nanodisks adsorbed Au gel at the room temperature for 2 h.

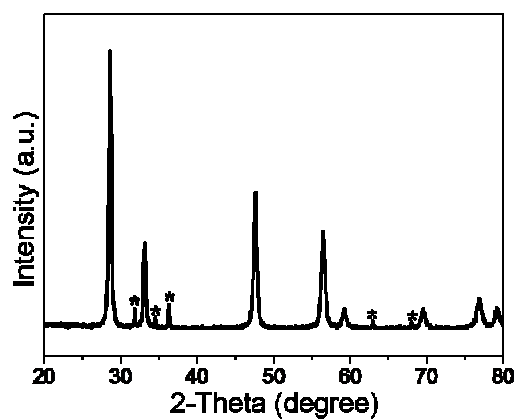

**Figure S8.** XRD pattern of Ce-Zn<sub>0.6</sub>. The phase of ZnO was indicated with \*.

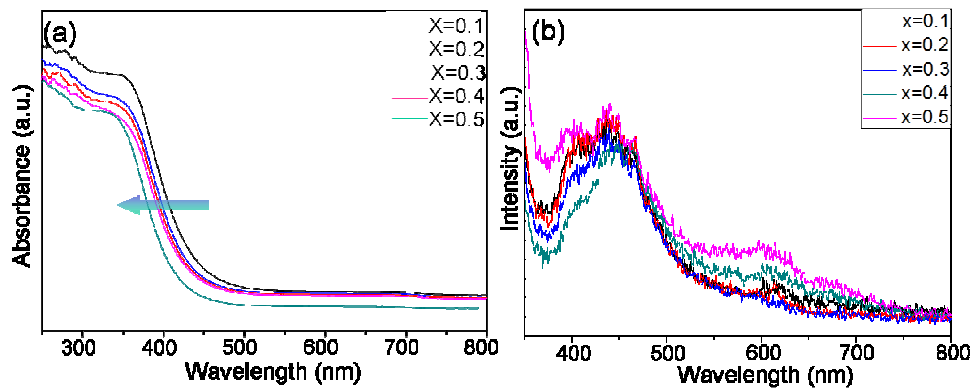

Figure S9. (a) UV-vis and (b) PL spectra of  $\text{Ce-ZnO}_3$  solid solutions.

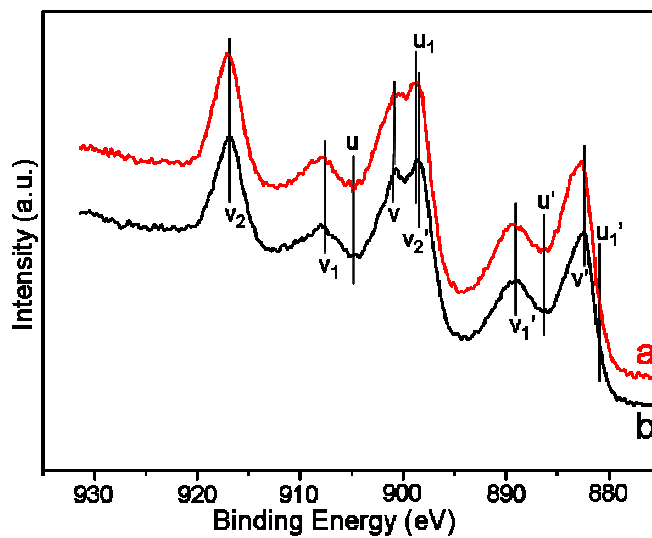

Figure S10.  $\text{Ce3d}$  XPS spectra from (a) ceria, (b)  $\text{Ce-ZnO}_3$  nanodisks prepared by precipitation and treated at the same temperature.

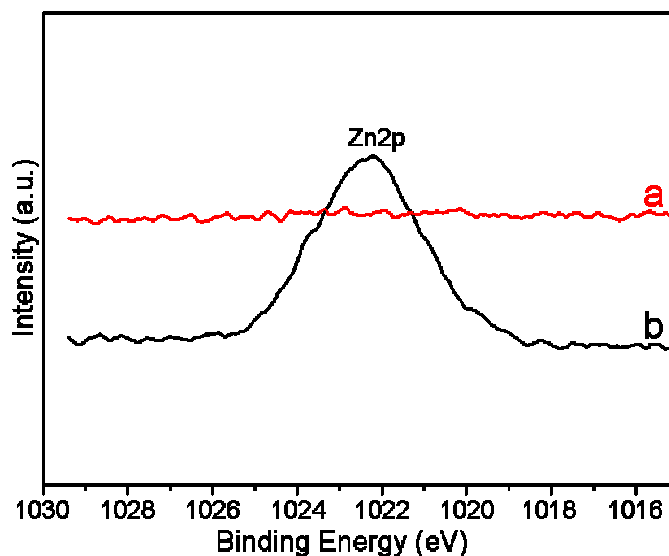

**Figure S11.** Zn2p XPS spectra from (a) ceria, (b)  $\text{Ce-Zn}_{0.3}$  nanodisks prepared by precipitation and treated at the same temperature.

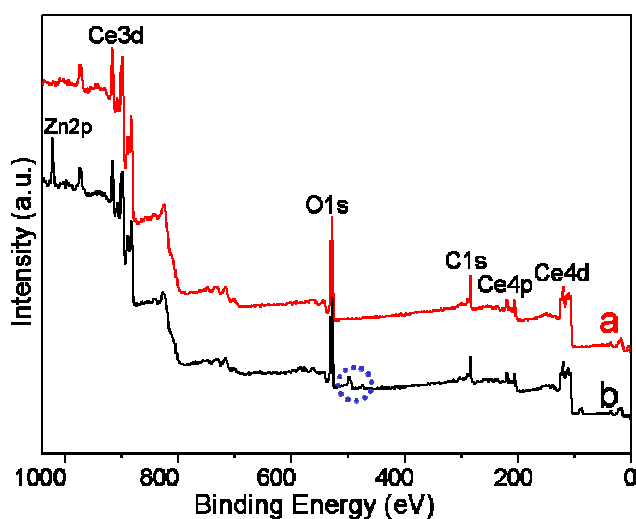

**Figure S12.** XPS full spectra of (a) ceria and (b)  $\text{Ce-Zn}_{0.3}$  nanodisks.

Figure S9 shows that the X-ray photoelectron spectra (XPS) obtained for the materials. The spectrum that obtained from traditional ceria and  $\text{Ce-Zn}_{0.3}$  prepared by precipitation is also given for comparison. The Ce 3d level has a very complicated structure. Six peaks labeled as  $v$ ,  $v_1$ ,  $v_2$  ( $3d_{5/2}$ ),  $v'$ ,  $v_1'$ ,  $v_2'$  ( $3d_{3/2}$ ) involving three pairs of spin-orbit doublets can be identified and they are characteristic of  $\text{Ce}^{4+}3d$  final states.<sup>4, 6</sup> By comparing with the conventional ceria nanoparticles,

four peaks due to two pairs of doublets [noted as  $u$ ,  $u'$ ,  $u_1$ ,  $u_1'$ ] corresponding to  $Ce^{3+}3d$  states can be observed in the  $Ce-Zn_{0.3}$  samples. The doublet  $u_1$  and  $u_1'$  are characteristic of  $Ce^{3+}$  species which lie at 885.7 eV and 904.1 eV, respectively.<sup>4, 5</sup> The full XPS spectra of ceria and  $Ce-Zn_{0.3}$  indicated that there were only cerium, zinc and oxygen element in the samples. The weak C1s peak and blue circle were due to the contamination of the samples.<sup>4</sup> Through the full spectra analysis, we could exclude the possible influence of other ions which may involve in the samples such as  $NO^{3-}$  during the experimental procedure.

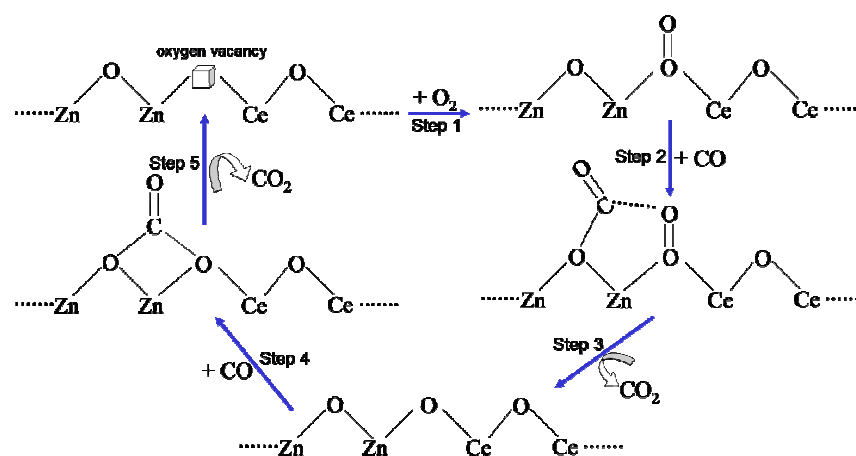

**Figure S13.** Proposed CO reaction pathways over  $Ce-Zn_x$  solid solution.

## References:

- (1) Tsunekawa, S.; Ishikawa, K.; Li, Z. Q.; Kawazoe, Y.; Kasuya, A. *Phys. Rev. Lett.* **2000**, 85, 3440.
- (2) Zhang, F.; Chan, S. W.; Spanier, J. E.; Apak, E.; Jin, Q.; Robinson, R. D.; Herman I. P. *Appl. Phys. Lett.* **2002**, 80, 127.
- (3) Deshpande, S.; Patil, S.; Kuchibhatla, S. V.; Seala, S. *Appl. Phys. Lett.* **2005**, 87, 133113.
- (4) Qiu, L. M.; Liu, F.; Zhao, L. Z.; Ma, Y.; Yao, J. N. *Appl. Surf. Sci.* **2006**, 252, 4931.
- (5) Natile, M. M.; Boccaletti, G.; Glisenti, A. *Chem. Mater.* **2005**, 17, 6272.
- (6) Liu, X. W.; Zhou, K. B.; Wang, L.; Wang, B. Y.; Li, Y. D. *J. Am. Chem. Soc.* **2009**, 131, 3140.
